# Supplementary material
Source: publisher site journal article supplement (https://www.dovepress.com/article/330875)
Supplement: Supplementary file 1 [file get_supplementary_file.php]

# B-cell deficiency exacerbates inflammation and bone loss in ligature-induced experimental periodontitis in mice

Wenmin Zeng1, Guojing Liu1, Qingxian Luan1, Chunyu Yang1, Shiyi Li1, Xiaoqian Yu1*, Li Su2*





**Supplementary Figure 1** CD19+ B cells detection within the cervical lymph nodes (**A**) and spleen (**B**) and among PBMC (**C**). Percentages of CD19+ B cells is reduced significantly in the cervical LN, spleen and among PBMC of the CD19Cre mice (less than 0.03%) compared with that in WT mice. As a local inflammatory response, ligation of the second maxillary molar-induced periodontitis does not change the percentages of B cells in WT mice or CD19Cre mice.
